# Supplementary material for: Self-organized ZnO nanorods prepared by anodization of zinc in NaOH electrolyte
Source: Royal Society of Chemistry journal article supplement (doi:10.1039/c6ra16995c), 2016-01-01
Supplement: c6ra16995c1.pdf [file c6ra16995c1.pdf]

## Supplementary Information

### Self-organized ZnO nanorods prepared by anodization of Zn in NaOH electrolyte

Junzhe Dong<sup>a</sup>, Zhuofeng Liu<sup>b</sup>, Junye Dong<sup>a</sup>, Dessy Ariyanti<sup>a</sup>, Zhenjiang Niu<sup>c</sup>, Saifang Huang<sup>a</sup>,  
Weijun Zhang<sup>b</sup>, Wei Gao<sup>a\*</sup>

<sup>a</sup>Department of Chemical & Materials Engineering, the University of Auckland, Auckland 1142, New Zealand

<sup>b</sup>College of Aerospace and Materials Engineering, National University of Defense Technology, Changsha 410073, China

<sup>c</sup>Institute of Physical Chemistry, Zhejiang Normal University, Jinhua 321004, China

|                                                             |           |
|-------------------------------------------------------------|-----------|
| Figure S1: XRD patterns                                     | Pag. SI 2 |
| Figure S2: EDS spectra                                      | Pag. SI 3 |
| Figure S3: FESEM cross-sectional images at 20, 30 and 40 V  | Pag. SI 4 |
| Figure S4: FESEM cross-sectional images for 0.5, 1 and 1.5h | Pag. SI 5 |
| Figure S5: FESEM surface images in 0.05, 0.1 and 0.2M NaOH  | Pag. SI 6 |

\* Author for correspondence

Phone No.: + 64 9 9238175; Fax No.: + 64 9 3737463; Email: w.gao@auckland.ac.nz

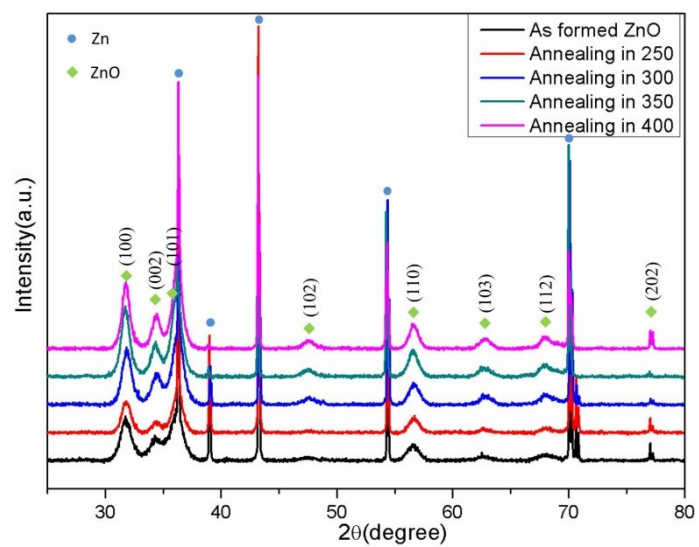

Fig. S1 XRD patterns of as-formed ZnO in 0.1M NaOH aqueous electrolytes at 12 V for 1h and after annealing at different temperature for 1h

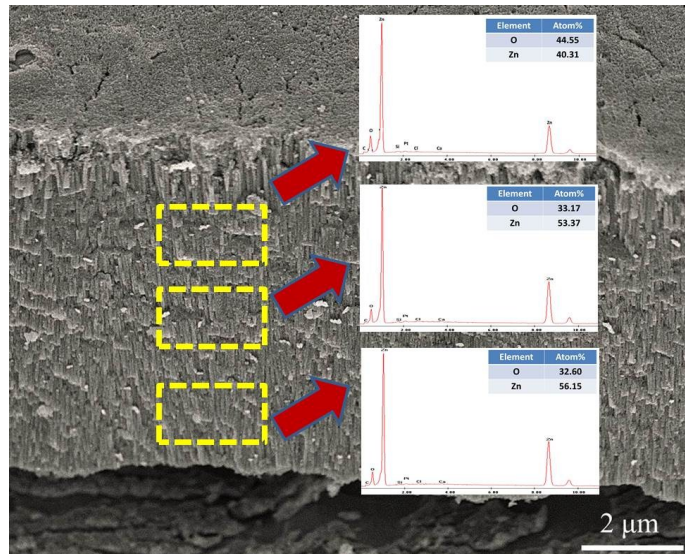

Fig. S2 EDS spectra of anodized ZnO prepared in 0.1M NaOH aqueous electrolytes at 12 V for 1h:  
upper part, middle part and bottom part

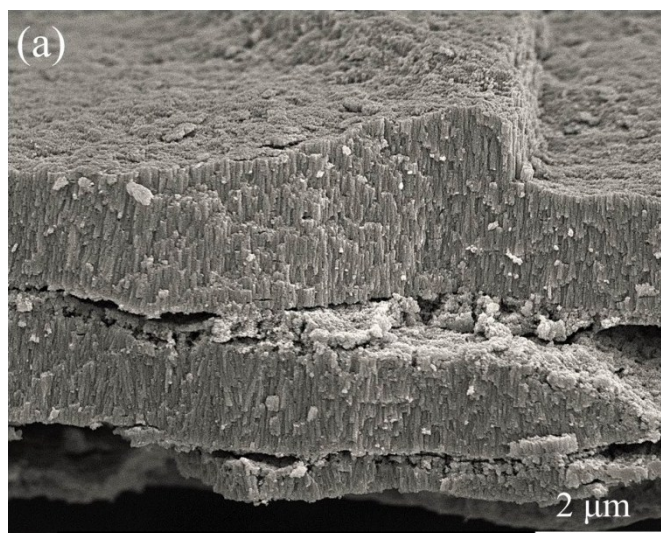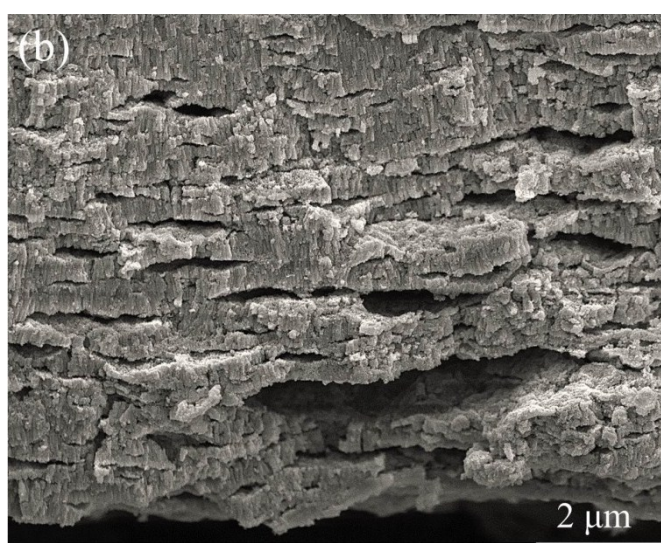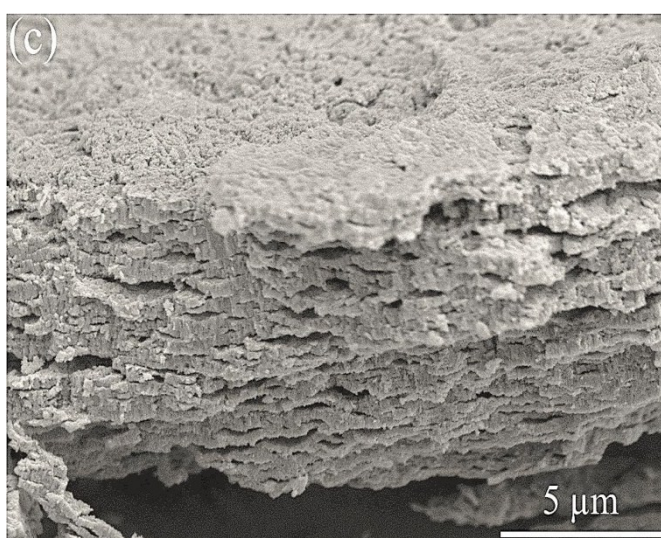

Fig. S3 FESEM cross-sectional images of anodic film prepared in 0.1M NaOH aqueous electrolytes for 1h at various voltages: (a) 20V, (b) 30V and (c) 40V

As shown in Fig. S4a-b, anodic ZnO layers are fabricated and substrate with smooth surface marked by yellow rectangle can be found underneath oxide layer. However, initial oxide layers are partially replaced by small secondary ZnO layer when duration time extends to 1.5 h (Fig. S4c).

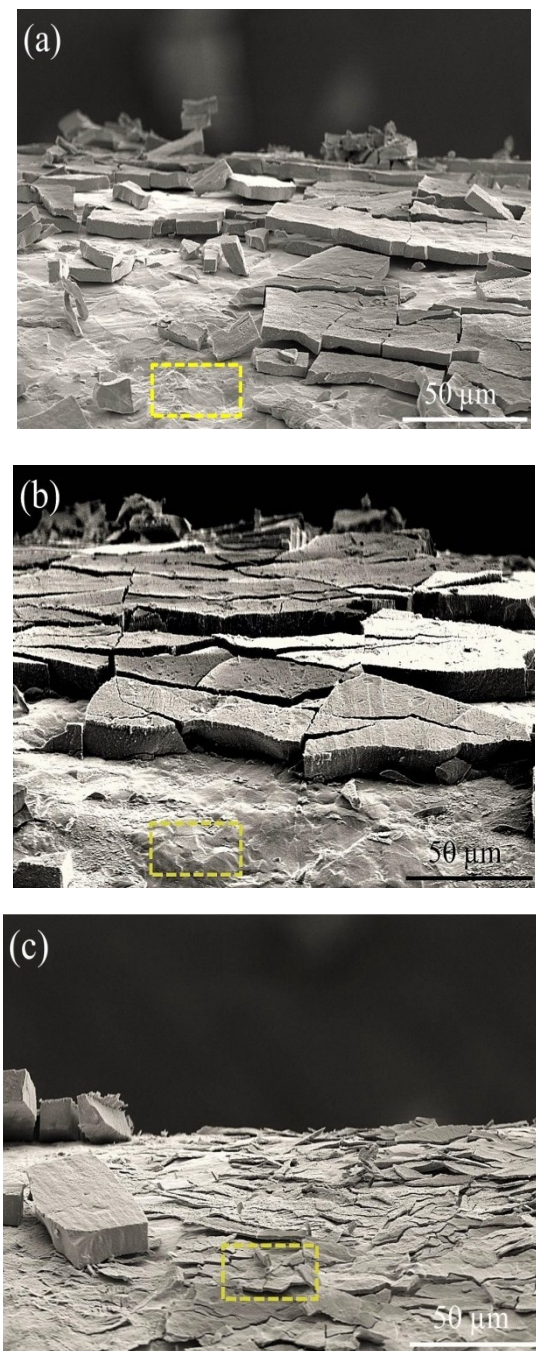

Fig. S4 FESEM images with low magnification of anodic film prepared in 0.1 M NaOH aqueous electrolytes at 12 V for different duration time: (a) 0.5 h; (b) 1 h and (c) 1.5 h

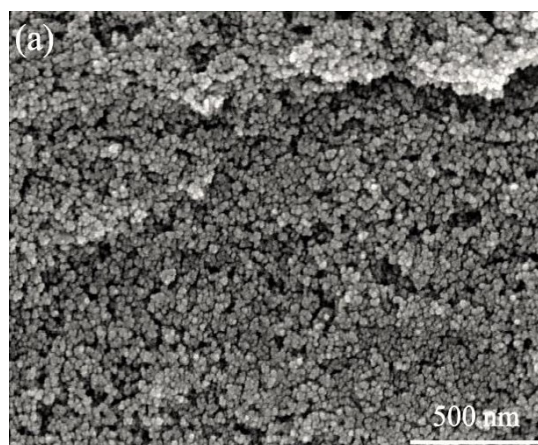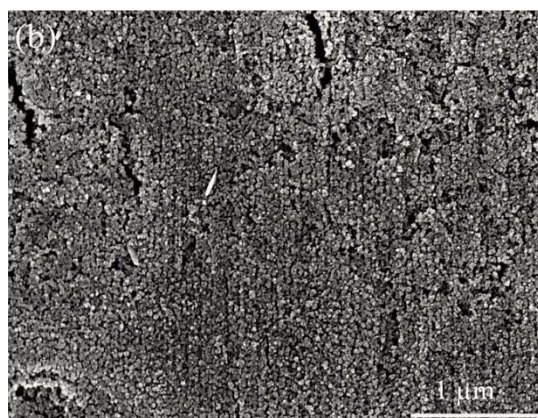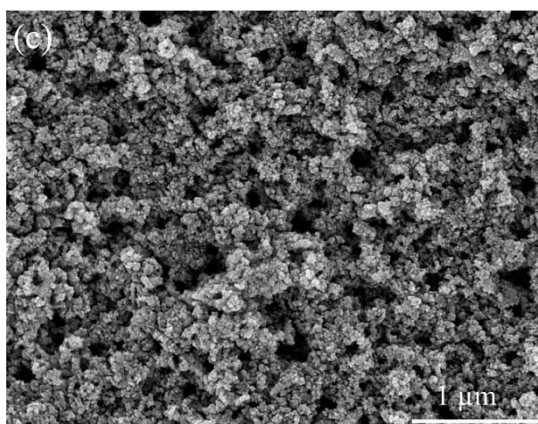

Fig. S5 FESEM images of anodic films prepared at 12 V for 1 h in different concentrations of NaOH in electrolytes: (a) 0.05M, (b) 0.1M and (c) 0.2M
